# Supplementary material for: Emulating the future distribution of perennial firn aquifers in Antarctica
Source: Copernicus journal article supplement (doi:10.5194/egusphere-2024-2855), 2024-10-16
Supplement: Supplementary file 1 [file egusphere-2024-2855-supplement.pdf]

## Supplementary materials

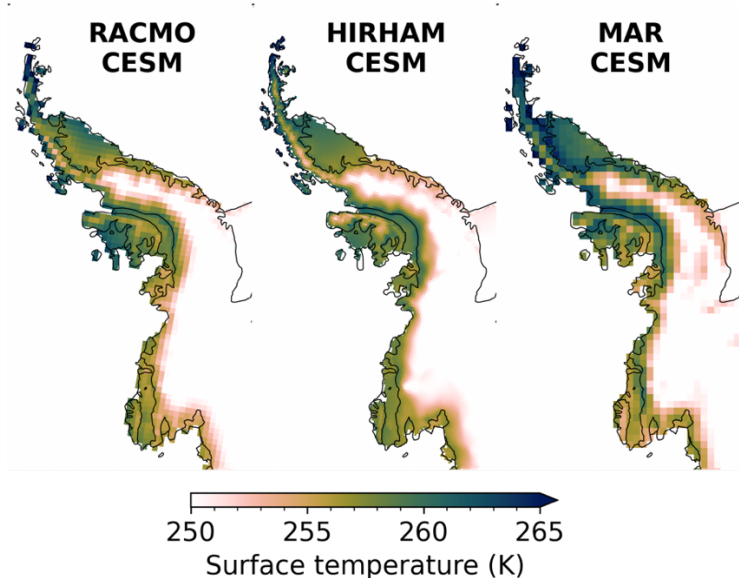

**Figure S1.** Annual average surface temperature over the historical period (1980-2014) for RACMO-CESM, HIRHAM-CESM and MAR-CESM over the Antarctic Peninsula and Ellsworth Land.

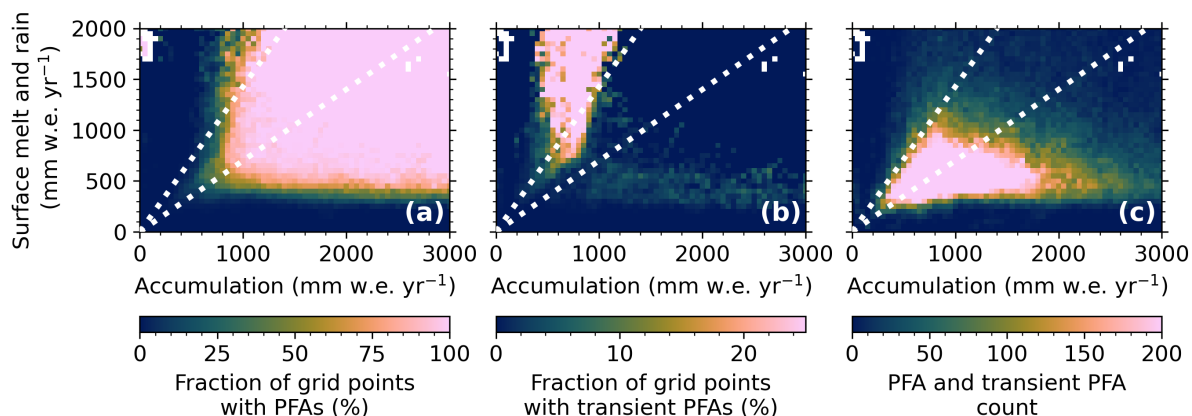

**Figure S2.** Percentage of **(a)** perennial firn aquifer (PFA) occurrence and **(b)** transient PFA occurrence, and **(c)** total amount of PFA and transient PFA occurrence from all HIRHAM simulations, as a function of annual surface melt and rainfall (y-axis) and snow accumulation (x-axis). The grid cells are grouped in melt and accumulation bins of 50 mm mm w.e. yr<sup>-1</sup>. The dotted lines indicate the 0.7 and 1.7 melt-over-accumulation (MoA) thresholds.

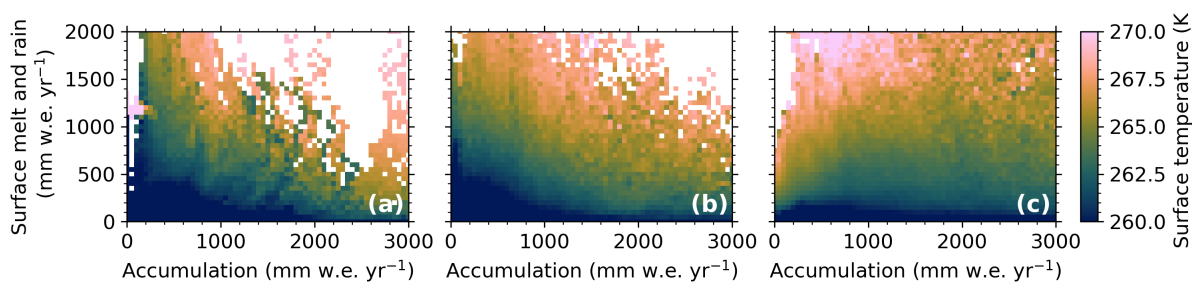

**Figure S3.** Annual average surface temperature as a function of annual surface melt and rainfall (y-axis) and snow accumulation (x-axis) for all **(a)** RACMO, **(b)** MAR and **(c)** HIRHAM simulations.

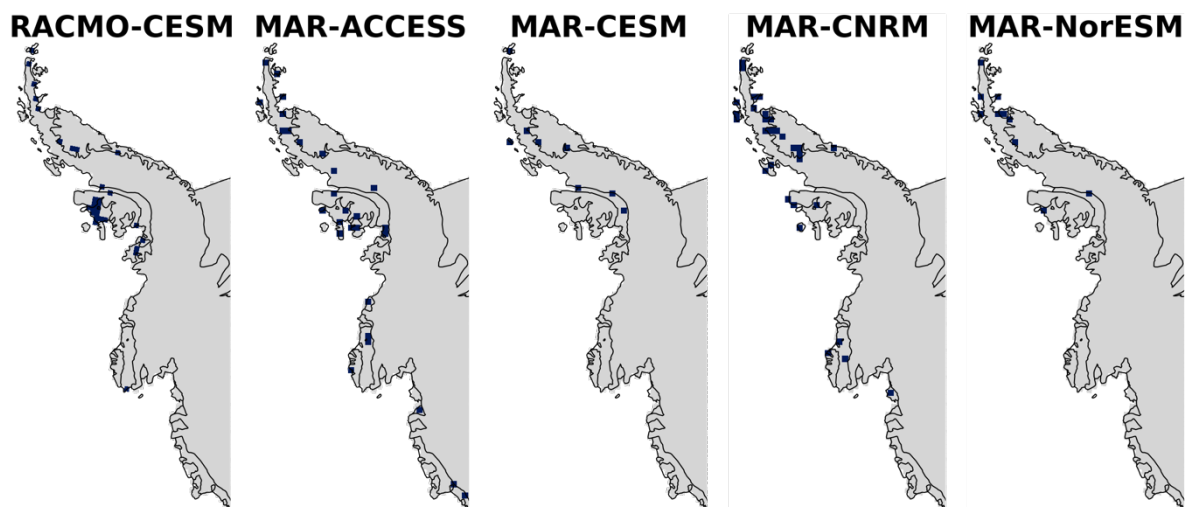

**Figure S4.** Locations with transient PFAs under SSP5-8.5 for RACMO and MAR are found in the Antarctic Peninsula, Ellsworth Land and Marie Byrd Land only and are indicates in blue.
